# Supplementary material for: Relationship between air quality and asthma-related emergency hospital admissions in Mexico City 2017–2019
Source: PubMed Central journal article supplement — Thorax. 2023 Nov 8;79(1):43–9. doi: 10.1136/thorax-2022-219262 (PMC10803984; doi:10.1136/thorax-2022-219262), 2023-11-08
Supplement: thorax-2022-219262supp001.pdf [file thorax-2022-219262supp001.pdf]

**Table S1.** Maximum Air Quality Limits for Mexico and WHO (2021) Guideline Values

| Pollutant                         | WHO (2021) Guideline Value     | Mexico Maximum Limits  |
|-----------------------------------|--------------------------------|------------------------|
| NO <sub>2</sub><br>annual mean    | 10 µg/m <sup>3</sup>           |                        |
| NO <sub>2</sub><br>1 hour mean    | 25 µg/m <sup>3</sup> <i>a</i>  | 400 µg/m <sup>3</sup>  |
| PM <sub>2.5</sub><br>annual mean  | 5 µg/m <sup>3</sup>            | 12 µg/m <sup>3</sup>   |
| PM <sub>2.5</sub><br>24 hour mean | 15 µg/m <sup>3</sup> <i>a</i>  | 45 µg/m <sup>3</sup>   |
| PM <sub>10</sub><br>annual mean   | 15 µg/m <sup>3</sup>           | 40 µg/m <sup>3</sup>   |
| PM <sub>10</sub><br>24 hour mean  | 45 µg/m <sup>3</sup> <i>a</i>  | 75 µg/m <sup>3</sup>   |
| O <sub>3</sub><br>8 hour mean     | 100 µg/m <sup>3</sup> <i>a</i> | 137 µg/m <sup>3</sup>  |
| SO <sub>2</sub> 24 hour mean      | 40 µg/m <sup>3</sup>           | 290 µg/m <sup>3</sup>  |
| SO <sub>2</sub> annual mean       |                                | 65 µg/m <sup>3</sup>   |
| CO 24 hour mean                   | 7 µg/m <sup>3</sup>            |                        |
| CO 8 hour mean                    |                                | 12.5 mg/m <sup>3</sup> |

*a* not to be exceeded more than 3-4 days per year

WHO 2021 Guidelines <https://apps.who.int/iris/bitstream/handle/10665/345329/9789240034228-eng.pdf?sequence=1&isAllowed=y>

Mexico Ambient Air Quality Standards – Secretaría de Salud <https://www.gob.mx/cofepris/acciones-y-programas/4-normas-oficiales-mexicanas-nom-de-calidad-del-aire-ambiente>

**Table S2.** Beta coefficients and standard errors for asthma related hospital admissions for an increase in pollutants, by age group and lag structure, adjusted for average daily temperature, average daily humidity, average daily wind speed, day of week, national holiday and season

|               | Lag Days | PM <sub>10</sub> |        |               | PM <sub>2.5</sub> |        |               | NO <sub>2</sub> |        |               |
|---------------|----------|------------------|--------|---------------|-------------------|--------|---------------|-----------------|--------|---------------|
|               |          | Beta             | SE     | AIC           | Beta              | SE     | AIC           | Beta            | SE     | AIC           |
| <b>0-4yrs</b> | 0        | -0.0002          | 0.0016 | 5923.8        | -0.0018           | 0.0024 | 5923.3        | 0.0018          | 0.0027 | 5923.4        |
|               | 1        | -0.0007          | 0.0014 | 5923.5        | -0.0021           | 0.0020 | 5922.8        | 0.0003          | 0.0017 | 5923.8        |
|               | 2        | -0.0018          | 0.0013 | 5921.9        | -0.0030           | 0.0019 | 5921.4        | -0.0017         | 0.0016 | 5922.8        |
|               | 3        | -0.0017          | 0.0013 | 5922.0        | -0.0023           | 0.0019 | 5922.3        | -0.0029         | 0.0016 | 5920.5        |
|               | 4        | -0.0027          | 0.0012 | 5919.2        | -0.0025           | 0.0019 | 5922.2        | -0.0030         | 0.0016 | 5920.1        |
|               | 5        | -0.0039          | 0.0012 | 5913.6        | -0.0036           | 0.0019 | 5920.2        | -0.0058         | 0.0016 | <b>5910.5</b> |
|               | 6        | -0.0043          | 0.0012 | <b>5912.0</b> | -0.0042           | 0.0019 | <b>5919.0</b> | -0.0057         | 0.0016 | 5910.9        |
|               | 7        | -0.0028          | 0.0012 | 5918.8        | -0.0018           | 0.0019 | 5923.0        | -0.0025         | 0.0016 | 5921.4        |
| <b>18+yrs</b> | 0        | 0.0024           | 0.0009 | 8009.3        | 0.0028            | 0.0013 | 8012.5        | 0.0014          | 0.0014 | 8016.4        |
|               | 1        | 0.0038           | 0.0007 | <b>7989.5</b> | 0.0051            | 0.0010 | 7993.5        | 0.0023          | 0.0009 | 8011.0        |
|               | 2        | 0.0036           | 0.0007 | 7990.3        | 0.0051            | 0.0010 | <b>7991.4</b> | 0.0026          | 0.0009 | 8008.2        |
|               | 3        | 0.0026           | 0.0007 | 8002.7        | 0.0042            | 0.0010 | 7999.3        | 0.0018          | 0.0009 | 8013.1        |
|               | 4        | 0.0029           | 0.0007 | 7999.0        | 0.0040            | 0.0010 | 8001.7        | 0.0022          | 0.0009 | 8011.0        |
|               | 5        | 0.0032           | 0.0007 | 7993.7        | 0.0045            | 0.0010 | 7997.1        | 0.0035          | 0.0009 | 8001.0        |
|               | 6        | 0.0020           | 0.0007 | 8008.2        | 0.0027            | 0.0010 | 8010.5        | 0.0035          | 0.0009 | <b>8000.8</b> |
|               | 7        | 0.0017           | 0.0007 | 8011.1        | 0.0022            | 0.0010 | 8012.7        | 0.0031          | 0.0009 | 8005.2        |

AIC=Akaike Information Criterion
